# Supplementary material for: Axl inhibition on dendritic cells enhances STING anticancer therapy through type I interferon signaling
Source: Research Square preprint supplement (doi:10.21203/rs.3.rs-5569516/v1), 2025-01-13
Supplement: Supplementary file 1 [file 8e8901f1040f41d7697b0a4d.docx]

| **Biolegend Catalog Number** | **Antigen** | **Barcode Sequence** |
| --- | --- | --- |
| 100569 | CD4 | AACAAGACCCTTGAG |
| 100773 | CD8a | TACCCGTAATAGCGT |
| 119729 | CD366 (Tim-3) | ATTGGCACTCAGATG |
| 109123 | CD279 (PD-1) | GAAAGTCAAAGCACT |
| 128047 | Ly-6C | AAGTCGTGAGGCATG |
| 101265 | CD11b | TGAAGGCTCATTTGT |
| 127655 | Ly-6G | ACATTGACGCAACTA |
| 103045 | CD44 | TGGCTTCAGGTCCTA |
| 400373 | Mouse IgG2b, isotype Ctrl | ATATGTATCACGCGA |
| 115559 | CD19 | ATCAGCCATGTCAGT |
| 103159 | CD45 | TGGCTATGGAGCAGA |
| 102055 | CD25 | ACCATGAGACACAGT |
| 117355 | CD11c | GTTATGGACGCTTGC |
| 123153 | F4/80 | TTAACTTCAGCCCGT |
| 107653 | I-A/I-E | GGTCACCAGTATGAT |
| 109247 | TCRb chain | TCCTATGGGACTCAG |
| 153604 | CD274 (B7-H1, PD-L1) | TCGATTCCACCAACT |
| 105047 | CD86 | CTGGATTTGTGTATC |
| 121437 | CD103 | TTCATTAGCCCGCTG |
| 401919 | Rat IgG1, gamma Isotype Ctrl | GGGAGCGATTCAACT |
| 400571 | Rat IgG2a, kappa Isotype Ctrl | AAGTCAGGTTCGTTT |
| 400739 | Rat IgG2c, kappa Isotype Ctrl | TCCAGGCTAGTCATT |
| 400973 | Armenian Hamster IgG Isotype Ctrl | CCTGTCATTAAGACT |
| 118237 | Ep-CAM | ACCCGCGTTAGTATG |
| 148227 | XCR1 | TCCATTACCCACGTT |
| 135917 | CD140a | GTCATTGCGGTCCTA |
| 104745 | CD80 | GACCCGGTGTCATTT |
| 124633 | CD40 | ATTTGTATGCTGGAG |
| 103523 | CD49b | CGCGTTAGTAGAGTC |
